# Supplementary material for: 2-Hydrazinoquinoline as a Derivatization Agent for LC-MS-Based Metabolomic Investigation of Diabetic Ketoacidosis
Source: Metabolites. 2013 Oct 31;3(4):993–1010. doi: 10.3390/metabo3040993 (PMC3937830; doi:10.3390/metabo3040993)

# Supplementary Materials

**Supplemental Figure 1.** PA, HP and DH derivatives of carboxylic acids, aldehydes and ketones. Molecular formula and chemical structures of these derivatives were determined by accurate mass measurement, elemental composition analysis and MS/MS fragmentation. The value of  $[M+H]^+$  is the mass-to-charge ratio ( $m/z$ ) of the protonated derivative. (A) Acetate-PA; (B) HBA-PA; (C) malate-PA; (D) pyruvate-PA; (E) acetate-HP; (F) HBA-HP; (G) malate-HP; (H) pyruvate-HP; (I) acetaldehyde-DH; (J) acetone-DH; (K) pyruvate-DH.

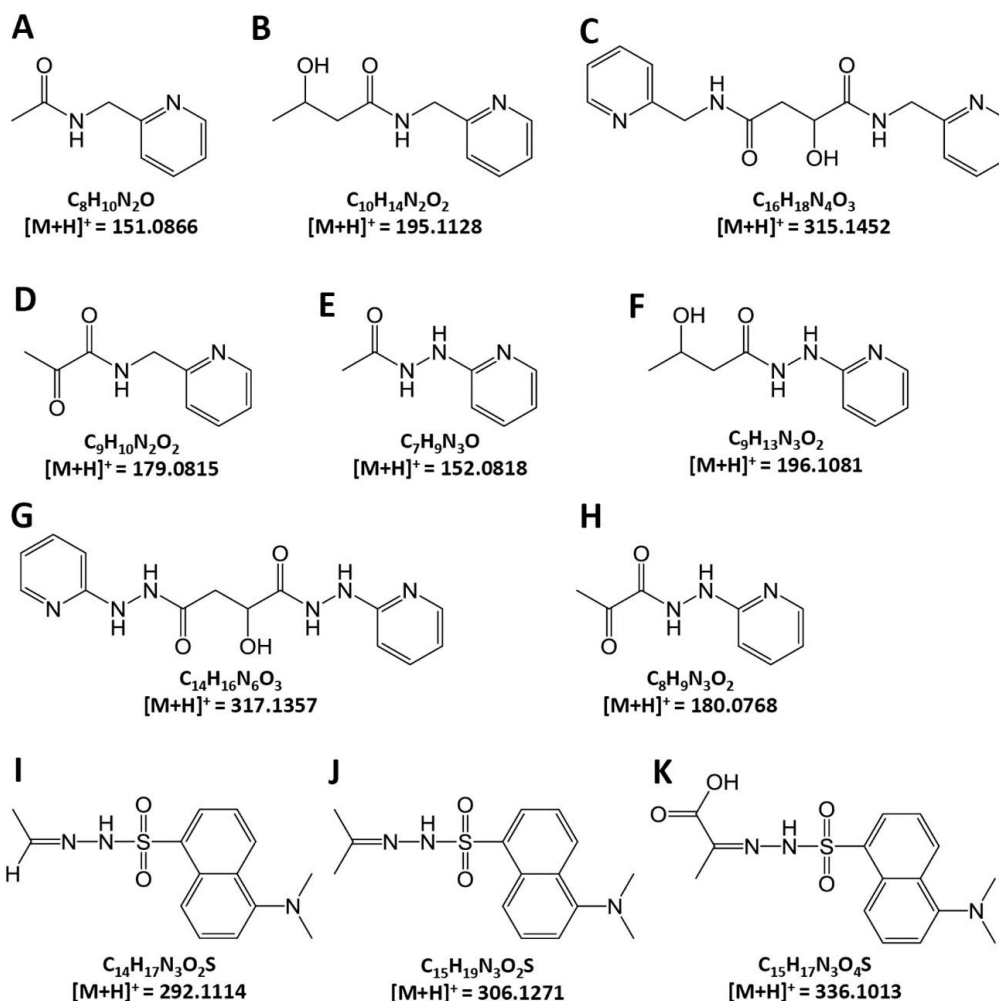

Supplement: Supplementary File 1 — Supplementary Materials (PDF, 122 KB) [file metabolites-03-00993-s002.pdf]
